# Supplementary material for: Reduced graphene oxide doped predominantly with CF2 groups as a superior anode material for long-life lithium-ion batteries
Source: Royal Society of Chemistry journal article supplement (doi:10.1039/c7cc09516c), 2018-01-01
Supplement: c7cc09516c1.pdf [file c7cc09516c1.pdf]

Electronic Supplementary Information for

**Reduced graphene oxide doped predominantly  
with CF<sub>2</sub> groups as a superior anode material  
for long-life lithium-ion batteries**

*Haoran An*<sup>1</sup>, *Yu Li*<sup>1,3,4</sup>, *Yiyu Feng*<sup>1,3,4</sup>, *Yu Cao*<sup>1</sup>, *Chen Cao*<sup>1</sup>, *Peng Long*<sup>1</sup>, *Shuangwen Li*<sup>1</sup> and *Wei Feng*<sup>1,2,3,4\*</sup>

1. School of Materials Science and Engineering, Tianjin University, Tianjin 300072, P. R China.

2. Collaborative Innovation Center of Chemical Science and Engineering, Tianjin 300072, P. R China.

3. Key Laboratory of Advanced Ceramics and Machining Technology, Ministry of Education, Tianjin 300072, P. R China.

4. Tianjin Key Laboratory of Composite and Functional Materials, Tianjin 300072, P. R China.

**Experimental section:**

**Synthesis of F-rGO.** Reduced graphene oxide (rGO) was purchased from Chengdu Organic Chemicals Co. Ltd. Chemical reagents purchased from Tianjin Jiangtian Chemical Company. The reduced graphene oxide was dispersed in a mixture solution

of 25 mL ethanol and 5 mL HF (40 wt%) by stirring for 5 min. Then the dispersion was transferred to a Teflon-lined autoclave followed by heating at 150 °C for 24 h. After cooling to room temperature, the obtained fluorine doped reduced graphene oxide (F-rGO) was washed with deionized water and ethanol to remove residual reagent and dried in a vacuum oven at 60°C for 24 h. For comparison, solvothermal treated reduced graphene oxide (Sol-rGO) were also prepared through the conventional hydrothermal process at 150 °C without adding HF into the dispersion. Graphene oxide (GO) was synthesized from natural graphite using the modified Hummers method. F-doped graphene oxide (F-GO) was synthesized by heating the mixture of GO solution (25 mL 1.0 mg/mL) and hydrofluoric acid (5 mL 40 wt%) at 150 °C for 24 h in a Teflon-lined autoclave. After removing the residual acid, the F-GO was dried through freeze drying.

**Characterization.** The morphology and surface microstructures were investigated by field-emission transmission electron microscopy (FETEM, JEOL JEM-2100F) and field-emission scanning electron microscopy (FESEM, Hitachi S-4800). Crystal structure was determined by X-ray diffraction (XRD, Rigaku D/max-2500 with Cu K $\alpha$  radiation). Fourier Transform Infrared (FT-IR) spectra were recorded on a Bruker Tensor 27 spectrometer. Raman scattering was performed on a Raman spectrometer (DXR Microscope, Thermo Electron) using laser excitation at 532 nm. X-ray photoelectron spectroscopy (XPS) analysis was obtained using PERKIN ELMZR PHI 3056 with an Al anode source operated at 15 kV to analyze the chemical composition of the materials. The N<sub>2</sub> adsorption-desorption isotherms were investigated with pore

size analyzer (Autosorb-iQ2-MP, America) and specific surface area was obtained by Brunauer Emmett Teller (BET) methods.

**Electrochemical measurements.** Electrochemical performances were evaluated by using CR2032 coin cells. To produce working electrodes, F-rGO, F-GO and Sol-rGO was mixed with Super-P carbon black and poly(vinylidene fluoride) with a weight ratio of 80:10:10 in N-methyl-2-pyrrolidone. The mixture slurries were coated on a copper foil. The coating was dried in an oven at 80 °C overnight. The resulting electrode film was cut into small disks (0.8 cm) with 1-2 mg active materials for the test in coin cells. The coin cells were assembled in a dry argon-filled glove box (Mikrouna Co., Advanced 2440/750), using lithium foil as the counter electrode, the electrolyte was 1.0 M LiPF<sub>6</sub> in a 1:1 volume ratio mixture of ethylene carbonate (EC)/dimethyl carbonate (DEC). The discharge/charge performances of assembled LIBs were tested in potential range of 0.01-3.0 V (vs. Li<sup>+</sup>/Li) at constant current densities (Land CT2001A, Wu Han Jin Nuo Electronics Co., China). Cyclic voltammetry (CV) tests were performed on a CHI660D electrochemical workstation in the same potential range at a scan rate of 0.5 mV s<sup>-1</sup>. Electrochemical impedance spectroscopy (EIS) was performed from 0.01 to 1 MHz frequency range using VERSASTAT3-100 .

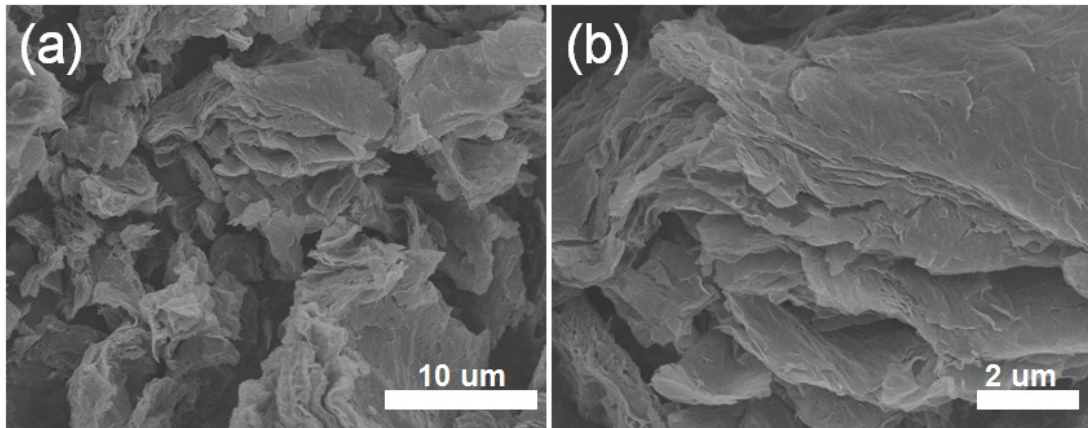

**Fig. S1** a) SEM image of Sol-rGO. b) Magnified SEM image of Sol-rGO.

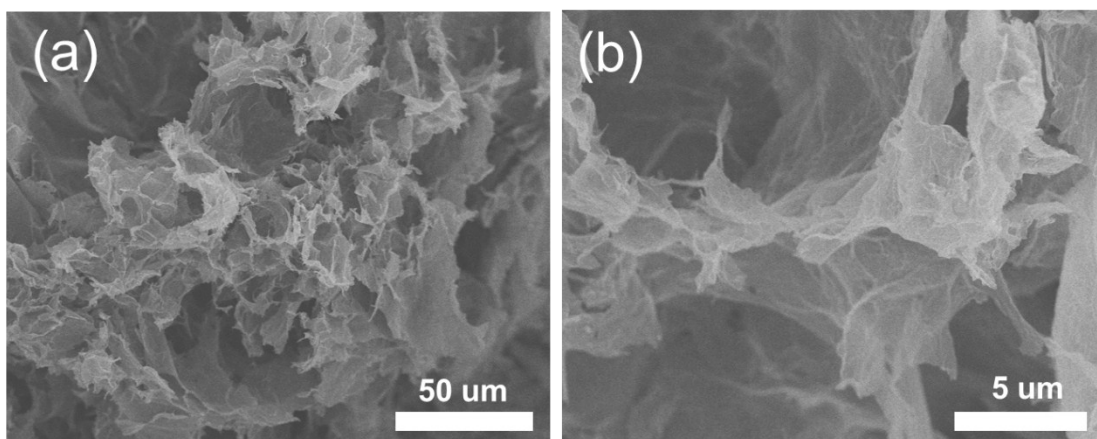

**Fig. S2** a) SEM image of F-GO. b) Magnified SEM image of F-GO.

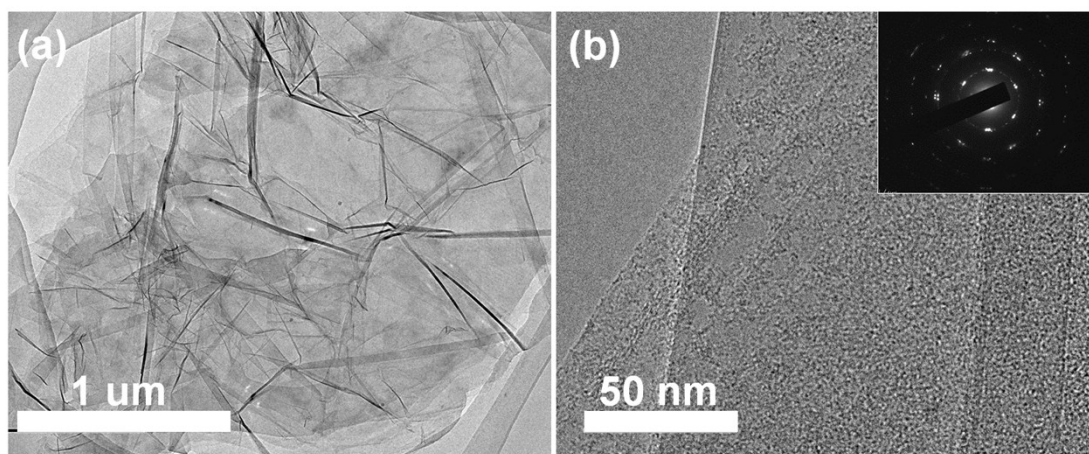

**Fig. S3** a) TEM image of Sol-rGO. b) HR-TEM image of Sol-rGO (inset shows the corresponding SEAD).

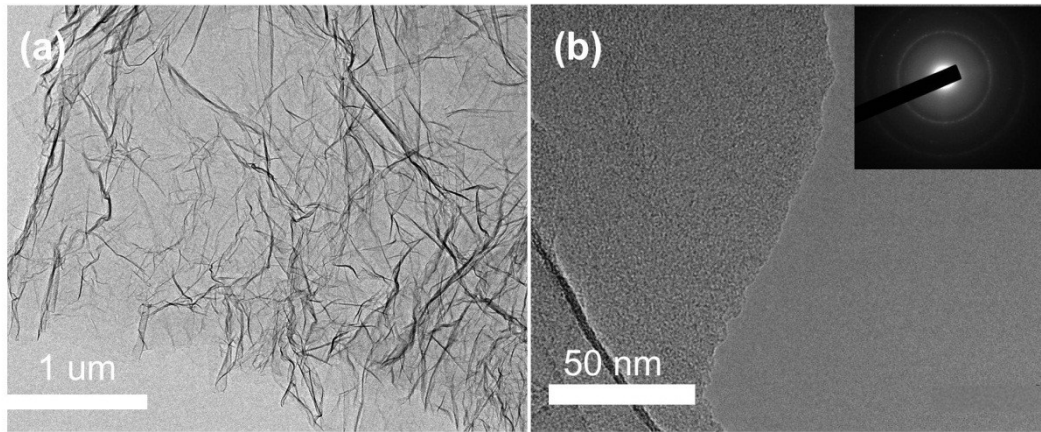

**Fig. S4** a) TEM image of F-GO. b) HR-TEM image of F-GO (inset shows the corresponding SEAD).

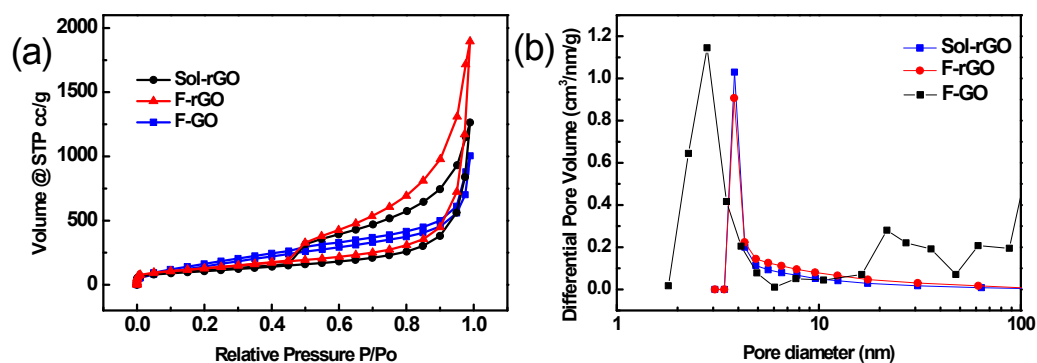

**Fig. S5** N<sub>2</sub> adsorption-desorption isotherms and pore size distributions of Sol-rGO, F-rGO and F-GO. The N<sub>2</sub> adsorption-desorption isotherms of prepared products display the type IV isotherms with a distinct hysteresis loop, indicating the porous characteristics. The pore size distributions analysed by Barrett-Joyner-Halenda (BJH) method revealed that F-rGO and Sol-rGO exhibit an average pore size of 3.8 nm and F-GO shows the coexistence of hierarchical micropores and mesopores. The pore volume of Sol-rGO, F-rGO and F-GO are 3.28 cc/g, 2.24 cc/g and 2.09 cc/g, respectively.



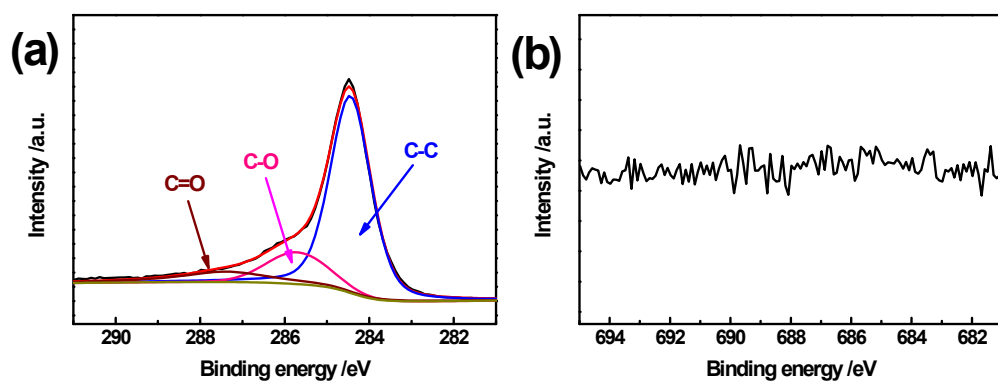

**Fig. S6** a) High-resolution C1s and b) F1s spectra of Sol-rGO.

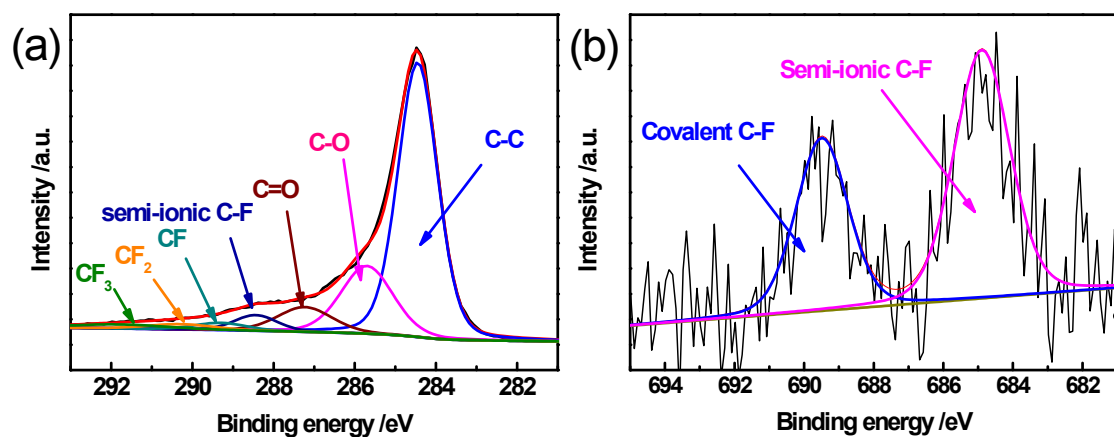

**Fig. S7** a) High-resolution C1s and b) F1s spectra of F-GO. The molar ratio of semi-ionic and covalent CF, CF<sub>2</sub>, and CF<sub>3</sub> groups is approximately 2.5:1:1:1, as calculated by integrating the corresponding peaks of C1s spectrum.

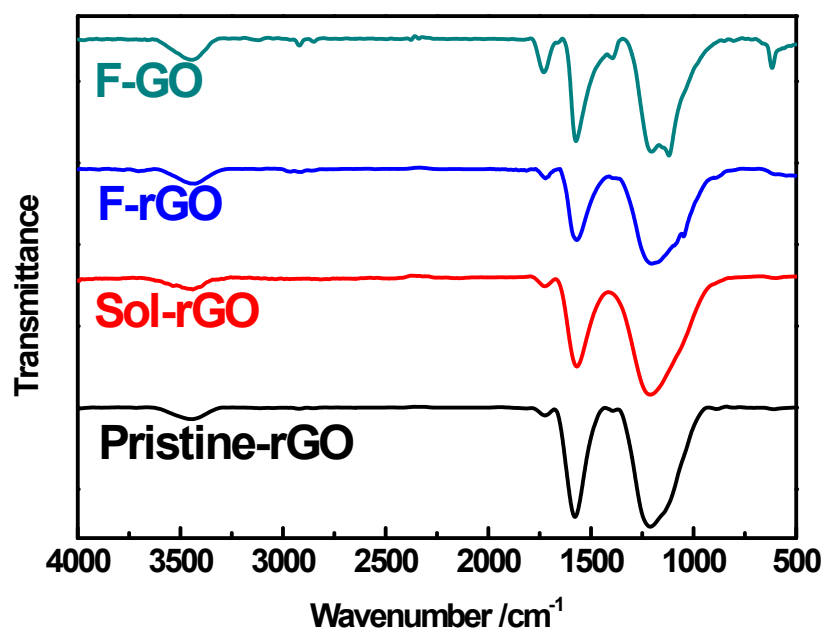

**Fig. S8** FT-IR of Pristine-rGO, Sol-rGO, F-rGO and F-GO. The appearance of a peak at  $1228\text{ cm}^{-1}$  in the spectrum is assigned to the breathing vibrational mode of the  $-\text{CH}(\text{O})\text{CH}-$  bond, the peak at  $1730\text{ cm}^{-1}$  is assigned to the carbonyl stretching mode of  $\text{C}=\text{O}$  and the carbonyl stretching mode of  $\text{C}=\text{C}$  at  $1625\text{ cm}^{-1}$  are observed in the spectrum of Pristine-rGO. After fluorination and solvation, the spectrum of F-rGO and Sol-rGO seems similar, because the oxygen containing groups still exist and the overlapping of covalent C-F bonds and  $-\text{CH}(\text{O})\text{CH}-$  bond. In the spectra of F-GO, a specific absorption peaks at  $1122\text{ cm}^{-1}$  is observed, which is assigned to the semi-ionic C-F bonds.

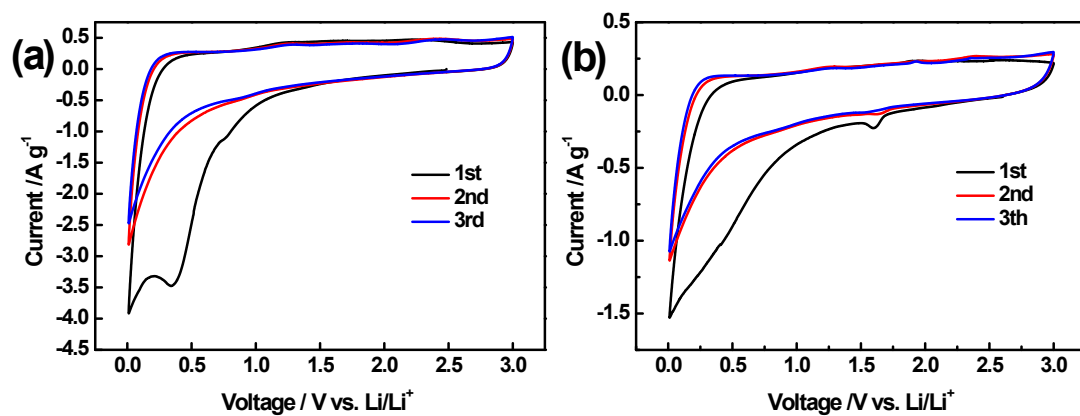

**Fig. S9** CV curves of a) Sol-rGO and b) F-GO between 0.01 and 3.0 V at a potential sweep rate of 0.5 mV s<sup>-1</sup>.

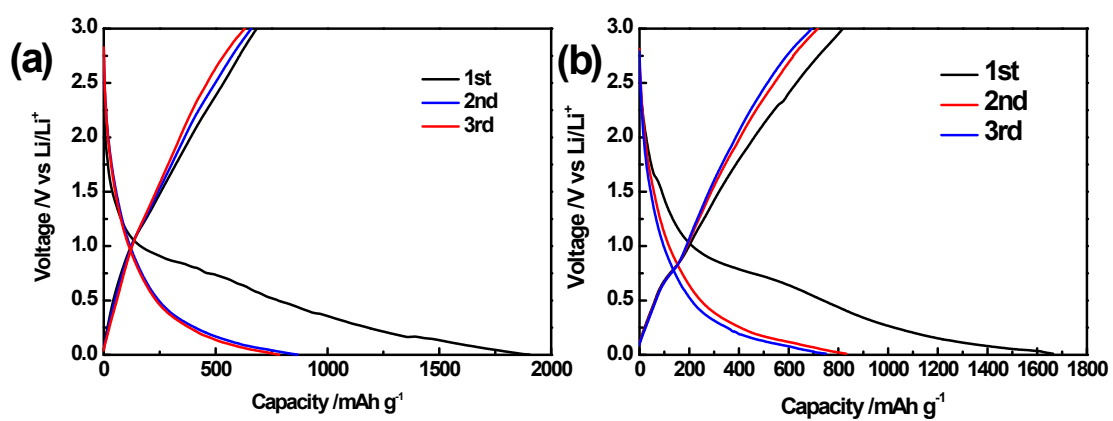

**Fig. S10** Galvanostatic charge/discharge curves of the a) Sol-rGO and b) F-GO electrode at a current density of 100 mA g<sup>-1</sup>.

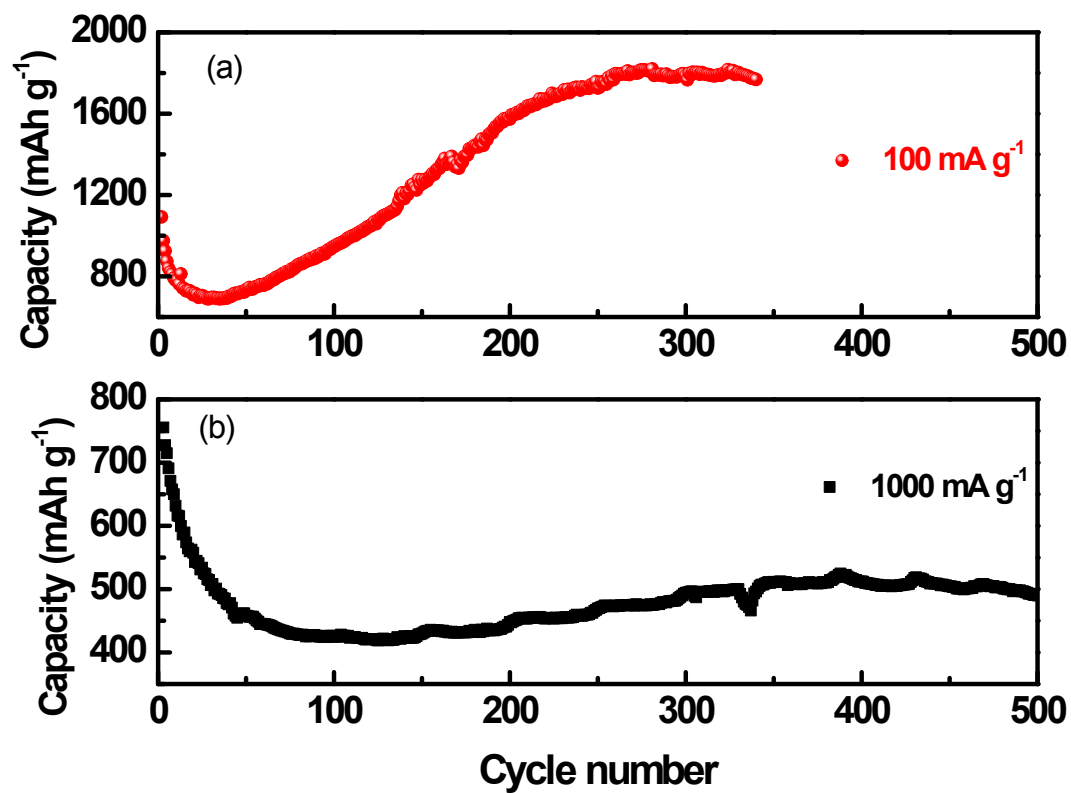

**Fig. S11** Cycling performance of the F-rGO electrodes over the 0.01 to 3.0 V potential range at a current density of a) 100 mA g<sup>-1</sup> a) 1000 ma g<sup>-1</sup>.

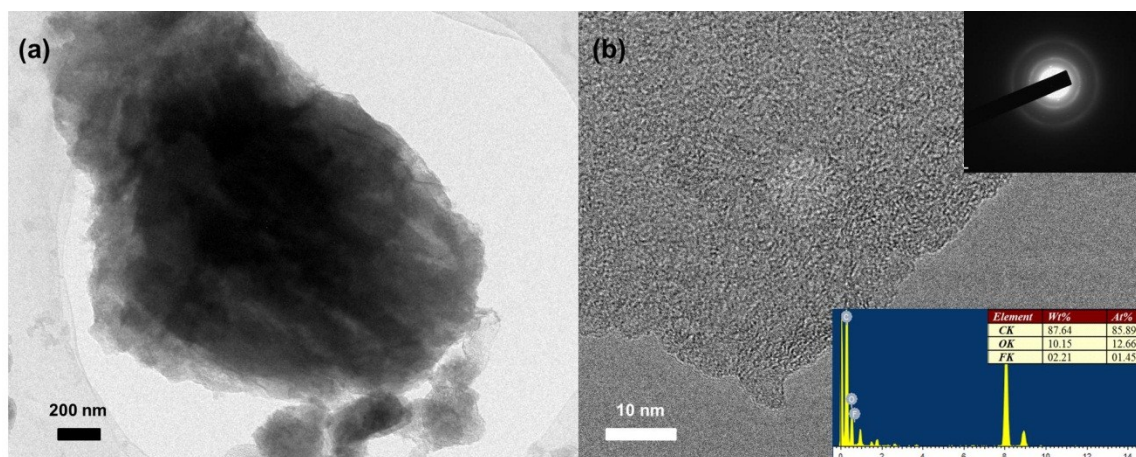

**Fig. S12** a) TEM image and b) HRTEM image of F-rGO after 200 charge/discharge cycles and the the corresponding SEAD and EDX analysis.

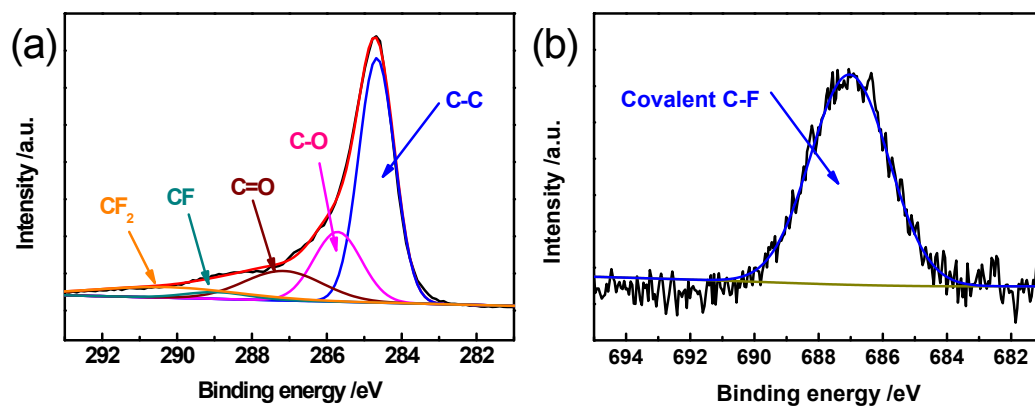

**Fig. S13** a) C1s and b) F1s spectra of F-rGO after 10 charge/discharge cycles. The content of F is 2.3 At% in F-rGO and the molar ratio of CF to CF<sub>2</sub> groups is 1:4.



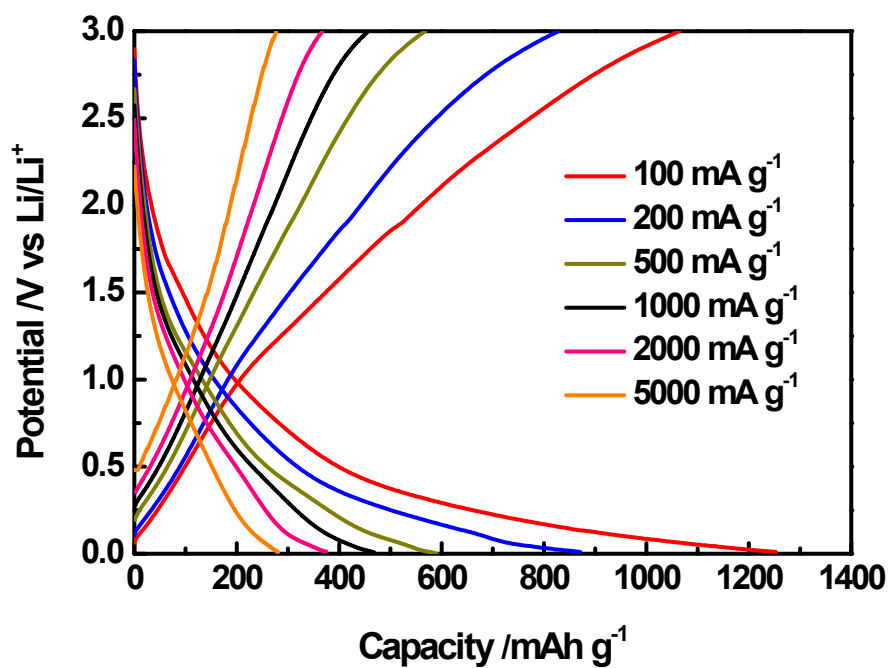

**Fig. S14** The charge/discharge profiles of F-rGO electrode at current densities of 100, 200, 500, 1000, 2000 and 5000 mA g<sup>-1</sup>.

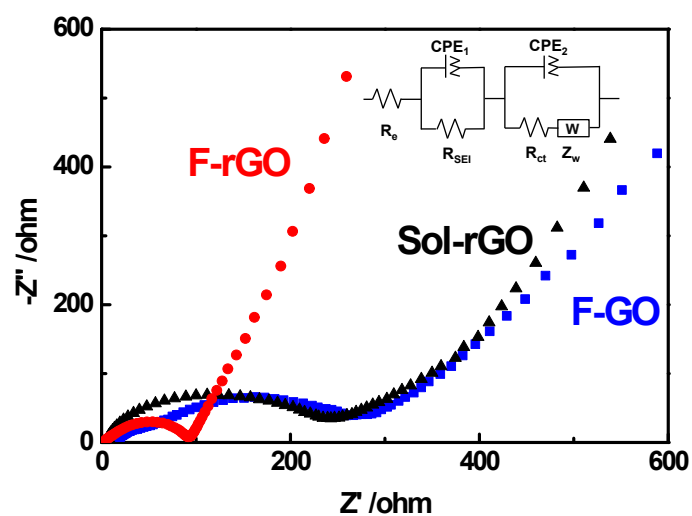

**Fig. S15** Nyquist plots of F-rGO, Sol-rGO and F-GO electrodes in the charged state after 200 cycles at the current density of  $100 \text{ mA g}^{-1}$  (inset: the equivalent circuit model for simulation). The simulated values of the components according to the equivalent circuit model are listed in Table S2.

**Table S1.** A summary of atomic percentages of C, F, and O.

| Sample  | C (at.%) | O (at.%) | F (at.%) |
|---------|----------|----------|----------|
| Sol-rGO | 92.0     | 8.0      | 0        |
| F-rGO   | 89.3     | 7.3      | 3.4      |
| F-GO    | 85.3     | 12.6     | 2.1      |

**Table S2.** Values of the equivalent circuit components used for fitting the experimental curve

| Components | $R_e$ (ohm) | CPE1-T<br>(F)        | $R_{SEI}$<br>(ohm) | CPE2-T<br>(F)         | $R_{ct}$ (ohm) |
|------------|-------------|----------------------|--------------------|-----------------------|----------------|
| Sol-rGO    | 3.03        | $4.31 \cdot 10^{-6}$ | 78.29              | $2.069 \cdot 10^{-5}$ | 151.2          |
| F-rGO      | 2.18        | 0.00139              | 20.45              | $4.11 \cdot 10^{-4}$  | 90.05          |
| F-GO       | 8.98        | $1.44 \cdot 10^{-4}$ | 127.59             | $2.72 \cdot 10^{-3}$  | 179.56         |
